1 **Running title:** Saffron evolution

2

3

4 **Saffron (*Crocus sativus*) is an autotriploid that evolved in Attica**  
5 **(Greece) from wild *Crocus cartwrightianus***

6

7 **Zahra Nemati,<sup>1,a</sup> Dörte Harpke,<sup>1,a</sup> Almila Gemicioglu,<sup>1,2</sup> Helmut Kerndorff,<sup>1</sup> and Frank R.**  
8 **Blattner<sup>1,\*</sup>**

9

10 <sup>1</sup>Leibniz Institute of Plant Genetics and Crop Plant Research (IPK), D-06466 Gatersleben,  
11 Germany.

12 <sup>2</sup>Dept. of Biology, University of Istanbul, Istanbul, Turkey.

13

14 <sup>a</sup>These authors contributed equally to the study

15

16 **\*For correspondence:** E-mail: [blattner@ipk-gatersleben.de](mailto:blattner@ipk-gatersleben.de)

17 Frank R. Blattner

18 Leibniz Institute of Plant Genetics and Crop Plant Research (IPK)

19 Corrensstr. 3

20 D-06466 Seeland/Gatersleben

21 +49 39482 5202

22

23

24 **Word counts**

25 Abstract: 149

26 Introduction: 521

27 Results and discussion: 2073

28 Materials and methods: 2039

29

30 Figures: 2

31 Tables: 1

32 Supporting information: 1 PDF

33

34

35 **Abstract**

36 ***Crocus sativus* is the source of saffron, which is made from dried stigmas of the plant.**  
37 **It is a male-sterile triploid that ever since its origin has been propagated vegetatively.**  
38 **The mode of evolution and area of origin of saffron are matters of long-lasting**  
39 **debates. Here we analyzed chloroplast genomes, genotyping-by-sequencing (GBS)**  
40 **data, nuclear single-copy genes, and genome sizes to solve these controversial**  
41 **issues. We could place 99.3% of saffron GBS alleles in *Crocus cartwrightianus*, a**  
42 **species occurring in southern mainland Greece and on Aegean islands, identifying it**  
43 **as the sole progenitor of saffron. Phylogenetic and population assignment analyses**  
44 **together with chloroplast polymorphisms indicated the wild *C. cartwrightianus***  
45 **population south of Athens as most similar to *C. sativus*. We conclude that the crop is**  
46 **an autotriploid that evolved in Attica by combining two different genotypes of *C.***  
47 ***cartwrightianus*. Vegetative propagation prevented afterwards segregation of the**  
48 **favorable traits of saffron.**

49

50 **Key words:** autotriploidy, *Crocus*, crop evolution, domestication, genotyping-by-  
51 sequencing, saffron

52

## 53 Introduction

54 Saffron is the most expensive spice worldwide and is used since ancient times for its aroma  
55 and the ability to give dishes and textiles a golden-yellow hue (Negbi, 1999). During the last  
56 decades also medicinal properties of the plant became of interest (Abdullaev and Frenkel,  
57 1999). The use of saffron was already documented in 3600-year-old Minoan frescos from the  
58 southern Aegean islands Crete and Santorini. At that time the plants were probably not *C.*  
59 *sativus* but belonged to wild saffron, *C. cartwrightianus* (Negbi and Negbi, 2002). While this  
60 latter species is an obligate outbreeding diploid, cultivated saffron is a male-sterile triploid.  
61 Both species are morphologically similar, but the stigma of the saffron crocus is thought to be  
62 longer and of darker color than that of wild saffron and the aroma is more pronounced in the  
63 cultivar. The overall similarity between both taxa was sometimes the reason to assume that  
64 *C. cartwrightianus* is the progenitor of the saffron crocus (Matthew, 1999; Negbi and Negbi,  
65 2002). However, there are other similar species and molecular data were inconsistent  
66 regarding the contribution of possible parental taxa. Although *C. cartwrightianus* has been  
67 postulated several times as parent or one of the parental species, also *C. almehensis*, *C.*  
68 *hadriaticus*, *C. haussknechtii*, *C. mathewii*, *C. michelsonii*, *C. pallasii*, *C. thomasi* and *C.*  
69 *serotinus* have been proposed as possible parents (see Nemati et al., 2018). However, none  
70 of the analyses conducted to date have allowed for the safe inference of the parent(s), partly  
71 due to study designs that did not include the relevant species, and partly due to  
72 methodological shortcomings (Nemati et al., 2018). Additionally, the mode of evolution of  
73 triploid *C. sativus*, i.e. if it originated through autopolyploidization from a single progenitor  
74 (Brighton, 1977; Ghaffari, 1986) or allopolyploidization involving two parental species  
75 (Tsafaris et al., 2011; Harpke et al., 2013) has been debated. In a recent study inferring  
76 phylogenetic relationships of the species of *Crocus* series *Crocus*, that is the taxonomic  
77 group to which *C. sativus* belongs, we found that *C. cartwrightianus* is the closest relative of  
78 the saffron crocus and hypothesized that no other species might have contributed to the  
79 formation of the triploid (Nemati et al., 2018).

80 Here we follow up on this hypothesis by analyzing genome-wide single-nucleotide  
81 polymorphisms (SNP) to see (i) if all alleles present in *C. sativus* can be detected within *C.*  
82 *cartwrightianus* or if a fraction of the saffron alleles might not be derived from this species.  
83 This should allow us to discern an auto- from an allopolyploid origin of saffron. (ii) SNP data  
84 are also used to find populations or areas where genetic similarity of the progenitor(s)  
85 towards *C. sativus* is highest. Depending on the species' genetic structure, this should allow  
86 identifying the region where *C. sativus* originated. (iii) We test the results of SNP data by  
87 analyzing diversity of chloroplast genomes, which provide an independent source of  
88 population data. (iv) To understand why analyses of potential progenitor species of the  
89 saffron crocus resulted up to now in widely contradicting results we analyze allele diversity at  
90 five nuclear single-copy genes in a group of species closely related to *C. sativus*.

91

92

## 93 Results and discussion

### 94 Analyses of genome-wide SNP data

95 To see if alleles present in *C. sativus* can all be traced back to its putative progenitor *C.*  
96 *cartwrightianus* and to infer the geographic location of the origin of saffron, we analyzed  
97 genome-wide SNP data obtained via genotyping-by-sequencing (GBS; Elshire et al., 2011).  
98 We first processed 22 saffron individuals within the IPYRAD analysis pipeline (Eaton, 2014) to  
99 detect the loci common for 85% of the individuals, i.e. assembling a GBS reference of saffron

100 that omits the majority of somatic present/absent mutations that might have accumulated  
101 through time within this clonal lineage as well as loci with too low or high coverage or  
102 indications that loci are not occurring in single-copy state. This reference, consisting of 6512  
103 GBS loci (of which 1768 were heterozygous in saffron), was then used to evaluate how many  
104 of the saffron GBS alleles occur in *C. cartwrightianus* and *C. oreocreticus*. Here we  
105 consistently used 7–10 individuals out of ten *C. cartwrightianus* populations from the species'  
106 entire distribution area (Figure 1A) and four individuals each out of two *C. oreocreticus*  
107 populations. We could place up to 90.47% of the GBS alleles occurring in saffron to the *C.*  
108 *cartwrightianus* populations analyzed, while 76.83% occur in *C. oreocreticus*. For the set of  
109 all 96 *C. cartwrightianus* individuals the proportion of saffron alleles was 98.58% (table 1).  
110 As *C. sativus* individuals are genetically very similar (Busconi et al., 2015) and this is also the  
111 case for the individuals we studied, we included ten of them in phylogenetic analyses based  
112 on the GBS dataset. In all analyses the samples of *C. sativus* grouped within *C.*  
113 *cartwrightianus* populations from the northern part of the species' distribution range and  
114 formed the sister group of the Attic individuals (Figure 1B, Figure S1 and S2; figures and  
115 tables indicated by "S" are available as Supplementary Files online). GBS-based genetic  
116 distances in *C. cartwrightianus* are an order of magnitude higher than in saffron (up to 0.41%  
117 vs. 0.032%), and also within the *C. cartwrightianus* populations genetic diversity is  
118 comparatively high (e.g., for Attica 0.29%), This is also reflected in the respective branch  
119 lengths of the phylogenetic trees (Figure S1 and S2). Differences in amount of genetic  
120 diversity between both species were also reported by Larsen et al. (2015). For a Bayesian  
121 population assignment analysis (Pearse and Crandall, 2004) we identified an optimum of  
122 nine groups of genotypes ( $K = 9$ ) including *C. oreocreticus*. Here saffron is assigned to the  
123 individuals from Attica (Figure 1C, Figure S3). However, we did not find a single *C.*  
124 *cartwrightianus* individual that is identical, or even most similar, to saffron but could only  
125 identify the entire Attica population as closest relatives of the cultivar, possessing 90.47% of  
126 the saffron GBS alleles. This correlation also holds after correction for sample size (Table 1).  
127 To see if all alleles occurring in *C. sativus* can be found in Attic *C. cartwrightianus* individuals  
128 we increased our sample from Attica to 71 individuals, which we genotyped by GBS. We  
129 could place 97.60% of the saffron GBS alleles in this set of Attic samples and together with  
130 the individuals from the other areas they accounted for 99.31% of the saffron alleles (Table  
131 1). Thus, only 0.69% of them could not be assigned to any of the included *C. cartwrightianus*  
132 individuals. This clearly indicates that only wild saffron contributed genetic material to saffron.  
133 Otherwise a much higher proportion of saffron GBS alleles should occur that are different  
134 from the ones found in *C. cartwrightianus*.

135

### 136 **Analysis of chloroplast genome diversity**

137 BLAST searches revealed that none of the 6512 GBS loci of saffron we used were derived  
138 from the chloroplast or mitochondrial genome. Therefore, we analyzed DNA differences in  
139 the maternally inherited chloroplast to base our conclusions also on a marker type that is  
140 independent from the nuclear GBS data. To obtain initial information about potentially  
141 informative loci we used genome skimming (Straub et al., 2012), which is based on low-  
142 coverage whole-genome shotgun (WGS) sequencing, and assembled the chloroplast  
143 genomes (Figure S4) of two *C. cartwrightianus* individuals from the southern (Crete) and  
144 northern (Attica) borders of the species' distribution area. The alignment of both chloroplast  
145 genomes had a length of 150,942 nucleotides and showed 99.97% identity. Among the  
146 differences was an 84 base pair (bp) deletion in the *trnS–trnG* intergenic spacer in the Attic

147 individual that we found also in an individual of *C. sativus*. We used this marker as sequence  
148 characterized amplified region (SCAR) to screen for chloroplast differences in *C. sativus* and  
149 *C. cartwrightianus* individuals from all populations. We found that all *C. sativus* individuals  
150 possess the short allele while in *C. cartwrightianus* it occurs only in Attica and in one out of  
151 two populations from the island of Kea (Figure 2). Kea is directly adjacent of Attica (Figure  
152 1A) and was connected to the mainland repeatedly when Quaternary sea levels dropped  
153 (Lambeck, 1996). This may have allowed gene flow between the crocus stands of these  
154 areas. In all other populations of *C. cartwrightianus* only the longer allele was detected  
155 (Figure 2).

156 To further compare the chloroplast sequences of saffron and Attic *C. cartwrightianus*, the  
157 chloroplast genome of a *C. sativus* individual was assembled. Comparing both sequences  
158 we found them to be identical except for an additional adenine occurring at position 1509 of  
159 the gene for the beta subunit of the acetyl-CoA carboxylase (*accD*) in *C. sativus*. This  
160 mutation results in a stop codon terminating the *accD* coding region three amino acids earlier  
161 than in the wild type. We re-sequenced the relevant region of the *accD* gene in 60 individuals  
162 of Attic *C. cartwrightianus* but could not detect the mutated variant in these samples. Still, the  
163 sole occurrence of the deletion in the *trnS-trnG* region in the chloroplast genome in Attic and  
164 Kean *C. cartwrightianus* individuals clearly places the maternal parent of the saffron crocus  
165 in this area of Greece and, thus, is in accord with the GBS data.

166

#### 167 **Analysis of genome size in *C. cartwrightianus***

168 To be able to infer the mode of origin of the triploid, i.e. if it evolved through a cross between  
169 a di- and a tetraploid parent or through the combination of a reduced with an unreduced  
170 gamete within diploids, we collected leaves from 100 *C. cartwrightianus* individuals in the  
171 Attica area, dried them in the field in silica gel, and analyzed genome sizes for these  
172 individuals in the lab by flow cytometry. We were able to obtain results for 91 individuals. We  
173 found that all of them have a 2C genome size of  $7.06 \pm 0.09$  pg (SD). This value was also  
174 observed in individuals with chromosome counts of  $2n = 2x = 16$ . From this we conclude that  
175 *C. cartwrightianus* in Attica is diploid and that tetraploid plants are not frequent. This is in  
176 accord with the observation that *C. sativus* is a clonal lineage that originated most probably  
177 only once, indicating that it was a rare event. If tetraploid individuals would occur regularly  
178 within the diploid *C. cartwrightianus* populations, triploid plants should arise over and over  
179 again through crosses between both ploidy levels. Over time such continuous input of  
180 triploids into the saffron gene pool should have broadened the genetic diversity occurring in  
181 saffron. This is, however, not the case as saffron is genetically rather uniform (Nemati et al.,  
182 2014; Busconi et al., 2015).

183

#### 184 **Analysis of nuclear single-copy loci**

185 Taking into account the high genetic diversity in *C. cartwrightianus*, we hypothesized that this  
186 could have influenced the outcome of earlier phylogenetic studies where *C. cartwrightianus*  
187 and *C. sativus* were included but did not result as sister species. We used DNA sequences  
188 of five single-copy genes that were amplified from *C. cartwrightianus*, *C. sativus* and their  
189 four closest relatives *C. hadriaticus*, *C. oreocreticus*, *C. pallasii* and *C. thomasii* (Nemati et  
190 al., 2018), which all share the same chromosome base number of  $x = 8$ . Where initial direct  
191 sequencing provided evidence for the presence of more than one copy of a gene within an  
192 individual, amplicons were cloned and six clones per individual were sequenced.  
193 Phylogenetic analyses of the DNA sequences of the five genes (Figure S5) revealed in all



194 cases that alleles occurring in different species were not completely sorted according to their  
195 species affiliation. This phenomenon, referred to as incomplete lineage sorting (Maddison,  
196 1997), is often found among closely related species (Jakob and Blattner, 2006; Brassac and  
197 Blattner, 2015). Even the different alleles or homeologs detected within the *C. sativus*  
198 individual were rather diverse and could group in different clades in the gene trees. Thus, the  
199 high genetic diversity in *C. cartwrightianus* is not restricted to non-coding parts of the  
200 genome (Larsen et al., 2015) but concerns also the gene space of this species, which could  
201 have rather diverse allelic constitutions.

202

## 203 **Conclusions**

204 Earlier molecular studies of saffron evolution did not arrive at clear results regarding the  
205 parental species of *C. sativus* or the area of origin of saffron. The main reason seems that  
206 they did not take into account the high intra-specific genetic diversity present in *C.*  
207 *cartwrightianus*. Depending on the individual(s) studied and the marker region used, the  
208 resulting phylogenetic trees might reflect nearly arbitrary relationships (Figure S5). In  
209 contrast, our GBS data were based on an exhaustive collection of *C. cartwrightianus*  
210 populations and clearly place the *C. sativus* individuals as sister of Attic *C. cartwrightianus*.  
211 Possible reasons for the sister group position instead of grouping within the Attic population  
212 is most probably the triploid and clonal nature of *C. sativus* that, as a group, has therefore a  
213 unique character combination that is in this way not present in any individual of *C.*  
214 *cartwrightianus*. Still, overall frequencies of GBS alleles (Table 1) and also chloroplast data  
215 (Figure 2) support the saffron origin within the Attica/Kea region with closest similarity of the  
216 saffron crocus to the *C. cartwrightianus* plants occurring in Attica (Figure 1B, 1C).

217 When collecting leaves of Attic *C. cartwrightianus*, we evaluated the populations for the  
218 presence of the important traits typical for the saffron crocus. We recognized the bunchy  
219 growing habit, very long stigmas, stigmas of rather dark red color (Figure 1D, Figure S6), and  
220 also stigmas with the specific taste and aroma of saffron, particularly in the southern part of  
221 this area. However, we did not find plants combining all these traits within single individuals  
222 in the same way as saffron. As genetic diversity is high in *C. cartwrightianus* and the species  
223 is an obligate outbreeder, it is unlikely to find in today's individuals regularly the exact allele  
224 combination characteristic for triploid *C. sativus*, as allele composition is constantly jumbled  
225 by genetic recombination. This is also apparent in the diverse karyotypes of *C.*  
226 *cartwrightianus*, where saffron-specific chromosomes can be found, although they are not  
227 united within single *C. cartwrightianus* individuals (Schmidt et al., 2019).

228 From Minoan frescos it is clear that more than 3600 years ago humans already used wild  
229 saffron in the southern Aegean. The first clear indication for the cultivation of triploid saffron  
230 can be found in *Historia Plantarum* (350 BC–287 BC) where Theophrastus described the  
231 plant as being propagated by corms (Negbi and Negbi, 2002). Our GBS data point to the  
232 small Greek region south of Athens as the place where saffron evolved. We assume that  
233 sometime in between 1600 BC and 350 BC a triploid *C. cartwrightianus* cytotype originated  
234 in Attica and was selected by humans. They must have realized that they have a highly  
235 aromatic and stable type at hands that keeps the valuable properties of saffron through time  
236 and (vegetative) generations. A bit surprising is the fact that the main growing regions for  
237 saffron are today found clearly outside the distribution area of *C. cartwrightianus*, i.e. in the  
238 western Mediterranean (Spain, Morocco) and western Asia (Iran to northern India). While *C.*  
239 *cartwrightianus* is restricted to the Mediterranean vegetation zone, saffron cultivation  
240 happens mostly in much drier regions and at higher elevation. Thus, we assume differences

241 in climate requirements between both species. This could indicate an ecologic niche shift due  
242 to polyploidization. We cannot yet determine how much triploidy influences the development  
243 of the typical traits of saffron or if the right allele combination in a diploid might provide similar  
244 characteristics. Still, the clarification of the mode of evolution of *C. sativus* now opens up a  
245 route for overcoming the low genetic diversity present in the saffron crocus, as it will foster  
246 new saffron genotypes to be created from different *C. cartwrightianus* individuals.

247

248

## 249 **Materials and methods**

### 250 **Taxon sampling**

251 We included 197 individuals in the genotyping-by-sequencing (GBS) study, 22 belonging to  
252 *C. sativus*, 167 to *C. cartwrightianus* and eight to *C. oreocreticus* (Table S1). The sampling of  
253 *C. cartwrightianus* covered its entire distribution range (Figure 1A). *Crocus oreocreticus*, the  
254 closest relative of *C. cartwrightianus* and *C. sativus* (Nemati et al., 2018), is endemic to  
255 Crete, where it was collected in two different populations with four individuals each. In  
256 addition we used single individuals of the other *Crocus* series *Crocus* species sharing the  
257 chromosome number of  $2n = 2x = 16$  with *C. cartwrightianus*, which were often named as  
258 parents of triploid *C. sativus* ( $2n = 3x = 24$ ). These are *C. hadriaticus*, *C. pallasii* and *C.*  
259 *thomasi*, which were included in screens of allelic diversity at nuclear single-copy genes.  
260 Voucher information for the analyzed taxa is provided in Table S1.

261

### 262 **DNA extraction and PCR reactions**

263 Extraction of genomic DNA was carried out using DNeasy Plant DNA Extraction Kit (Qiagen)  
264 from about 10 mg of silica-dried leaf material according to the protocol of the manufacturer.  
265 DNA concentration and quality were afterwards checked on 0.8% agarose gels.

266 To obtain nuclear single-copy marker regions with high variability in *Crocus*, we used contigs  
267 derived from the assembly of low-coverage next-generation sequencing (Illumina HiSeq  
268 platform; see below) of *Crocus cartwrightianus*. Potential nuclear single-copy genes and their  
269 intron-exon borders were identified using the PLAZA v2.5 and v3 platform (Van Bel et al.,  
270 2012; Vandepoele, 2017).

271 We selected five nuclear single-copy genes (Table S2), which all were heterozygous in *C.*  
272 *sativus*, and PCR amplified them in five *Crocus* species closely related to saffron. PCR was  
273 performed with 1 U Phusion High-Fidelity DNA Polymerase (Thermo Scientific) in the  
274 supplied Phusion GC Buffer, 200  $\mu$ M of each dNTP, 0.5  $\mu$ M of each primer, and about 20 ng  
275 of total DNA in 50  $\mu$ l reaction volume in a GeneAmp PCR System 9700 (Perkin-Elmer).  
276 Amplification was performed with 3 min initial denaturation at 95 °C and 35 cycles of 30 s at  
277 95 °C, 25–60 sec at the marker-specific annealing temperature (table S2) and 30 s at 70 °C,  
278 followed by a final extension for 8 min at 70 °C. PCR products were purified on a 1% gel and  
279 extracted using QIAquick Gel Extraction Kit (Qiagen) following the manufacturer's protocol,  
280 and eluted in 30  $\mu$ l water. Both strands of the PCR products were initially directly sequenced  
281 with Applied Biosystems BigDye Terminator technology on an ABI 3730xl automatic DNA  
282 sequencer using the primers from PCR amplifications. When direct sequencing revealed  
283 polymorphic sequence positions or length differences, PCR products were cloned into the  
284 pGEM-T Easy vector (Promega) and six clones per individual were sequenced with Templi-  
285 Phi DNA Sequencing Template Amplification Kit (Amersham Biosciences).

286

## 287 **Library preparation and next-generation sequencing**

288 To obtain genome-wide single-nucleotide polymorphisms (SNPs), genotyping-by-sequencing  
289 (GBS) analyses (Elshire et al., 2011) were conducted for 197 individuals. For the library  
290 preparation 200 ng of genomic DNA were used and cut with the two restrictions enzymes  
291 *Pst*I-HF (NEB) and *Msp*I (NEB). Library preparation, individual barcoding, and single-end  
292 sequencing on the Illumina HiSeq 2000 followed Wendler et al. (2014).

293 For WGS sequencing of *C. cartwrightianus* from Crete and Attica 1-2 µg DNA were used.  
294 Library preparation was carried out as described by Meyer and Kircher (2010) for *C.*  
295 *cartwrightianus* from Crete. Library preparation for *C. cartwrightianus* from Attica was done  
296 according to the Illumina TruSeq DNA library preparation protocol following the  
297 manufacturer's recommendations. DNA was covarized to generate fragments of on average  
298 300-400 bp length for the Crete and 400-600 bp for Attic *C. cartwrightianus*, followed by  
299 adaptor and barcode ligation. For *C. cartwrightianus* from Crete an additional 8-kb mate-pair  
300 library was generated. The libraries were size-selected with a SYBR Gold stained  
301 electrophoresis gel. Fragment size distribution and DNA concentration were evaluated on an  
302 Agilent BioAnalyzer High Sensitivity DNA Chip and using the Qubit DNA Assay Kit in a Qubit  
303 2.0 Fluorometer (Life Technologies). Finally the DNA concentration of the libraries was  
304 checked by a quantitative PCR run. Cluster generation on Illumina cBot and paired-end  
305 sequencing (*C. cartwrightianus* from Crete: 2x100 bp; *C. cartwrightianus* from Attica: 2x250  
306 bp) on the Illumina HiSeq 2000/2500 platform followed Illumina's recommendation and  
307 included 1% Illumina PhiX library as internal control. The 8-kb mate-pair library of *C.*  
308 *cartwrightianus* from Crete was sequenced using 20% of a lane on the Illumina MiSeq  
309 platform generating 2x250 bp paired-end reads.

310 Barcoded reads were de-multiplexed using the CASAVA pipeline 1.8 (Illumina). The obtained  
311 raw sequencing reads were quality checked and over-represented, i.e. clonal reads were  
312 detected with FASTQC (Andrew, 2010). Adapter trimming of sequence reads was performed  
313 with CUTADAPT (Martin, 2011) and reads shorter than 60 bp after adapter removal were  
314 discarded.

315

## 316 **Genome assembly of whole-genome shotgun data and chloroplast genomes**

317 *De novo* assembly of WGS sequences of *C. cartwrightianus* from Crete with 210 million  
318 quality-filtered read pairs was performed in CLC v4.3.0 (CLC bio) with a minimum length for  
319 assembled contigs of 500 bp. NCBI BLAST v2.2.28+ searches were used to check for  
320 bacterial contaminations in the sequence reads and to identify plastid-derived contigs.  
321 Scaffolding with SSPACE v3.0 (Boetzer et al., 2011) was performed with a minimum number  
322 of 100 linked reads to compute a scaffold.

323 Plastid scaffolds were identified by a BLAST search. The scaffolds were then mapped to the  
324 chloroplast genomes of *Beta vulgaris* (GenBank accession number KR230391), *Haloxylon*  
325 *persicum* (KF534479) and *Iris gatesii* (KM014691). GAPFILLER v1.10 (Boetzer and Pirovano,  
326 2012) was used to fill gaps. Proper pairing of reads was checked by mapping the original  
327 reads against the obtained *C. cartwrightianus* plastid genome using GENEIOUS R10.2.3  
328 (Biomatters Ltd.) and checked manually.

329 Illumina sequencing with lower coverage produced 123.6 million (61.8 million paired end)  
330 quality-filtered reads for *C. cartwrightianus* from Attica. For *C. sativus* 74.4 million (37.2  
331 million paired end) quality-filtered reads from a WGS experiment were provided by Thomas  
332 Schmidt and Tony Heitkam (Molecular and Cell Biology, University of Dresden, Germany)  
333 and assembled as before.



334 The chloroplast genome of *C. cartwrightianus* from Crete obtained by *de novo* assembly was  
335 used as a reference sequence for chloroplast genomes of *C. cartwrightianus* from Attica and  
336 *C. sativus*. Annotation of chloroplast genomes was performed in GENEIOUS and edited  
337 manually.

338

### 339 **Chloroplast polymorphisms screening**

340 A sequence part of the chloroplast *trnS*(GCU)–*trnG*(UCC) intergenic spacer, where an 84-bp  
341 deletion was observed in *C. sativus* and *C. cartwrightianus* from Attica, as well as a 1-bp  
342 insertion in the *accD* gene in *C. sativus* at position 1509 were confirmed by Sanger re-  
343 sequencing (Table S2). Screening of the distribution of the 84-bp deletion in the *trnS*–*trnG*  
344 intergenic spacer was conducted by PCR amplification of the respective chloroplast region in  
345 the set of 96 *C. cartwrightianus* individuals covering the populations from the entire  
346 distribution area of the species (table 1) plus the *C. sativus* individuals. Size determination of  
347 the PCR products was done on 1.4% agarose gels against a 100-bp DNA ladder and always  
348 including one saffron amplicon as reference for the short allele.

349

### 350 **Processing of genotyping-by-sequencing data**

351 To have a particular focus on loci present in *C. sativus* we first generated a loci reference file  
352 using IPYRAD v0.7.19 (Eaton, 2014). An assembly of the GBS data of 22 saffron individuals  
353 was done *de novo*. The minimal number of samples per locus was set to 18, the clustering  
354 threshold of reads within and between individuals was set to 0.9. The maximum ploidy level  
355 was appointed as triploid. For the other parameters the default settings of parameter files  
356 generated by IPYRAD were used. The locus file generated by IPYRAD was converted into a  
357 FASTA file with 6512 sequences corresponding to the number of obtained loci.

358 Additional IPYRAD analyses were run, using either 126 or 197 individuals and the reference-  
359 based assembly of IPYRAD. The clustering threshold of reads within and between individuals  
360 was set to 0.9. The maximum ploidy level was appointed as triploid. For the other parameters  
361 the default settings of parameter files generated by IPYRAD were used except for the maximal  
362 number of indels, which was increased to 15. The minimal number of samples per locus was  
363 set to 18 to generate the output file used for the determination of the proportion of SNPs *C.*  
364 *sativus* shares with *C. cartwrightianus* and *C. oreocreticus*. For Bayesian assignment as well  
365 as the phylogenetic analyses, the minimal number of samples per locus was set to 55.

366 VCFTOOLS 0.1.14 (Danacek et al., 2011) were used to filter out the genotypes with a depth  
367 below six.

368

### 369 **Determining the proportion of shared GBS alleles**

370 The number of shared GBS alleles between the species and populations was inferred using  
371 PopGenReport (Adamack and Gruber, 2014) in R 3.5.0. In principle, the filtered vcf file was  
372 first converted into a genind object, then concatenated with the information about the sample  
373 origin and converted into a genpop object. The genpop file directly includes the allelic counts  
374 per variable position, which we here simply refer to as SNPs. SNPs not present and SNPs  
375 potentially originating by autosomal mutation in saffron (present in less than four counts in  
376 saffron) were excluded. Counting and calculating percentages were conducted in Microsoft  
377 EXCEL v14 after transposing the genpop matrix in R. In addition to the dataset where we  
378 used all individuals per population we also calculated the proportion of shared GBS alleles  
379 for seven (lowest number of individuals among our population samples) randomly chosen

380 individuals for the populations where higher individual numbers were available. For this  
381 normalized dataset the included individuals were permuted ten times and the percentage of  
382 shared GBS alleles was averaged over the ten runs.

383

#### 384 **Phylogenetic and population genetic analyses**

385 Forward and reverse sequences for the five nuclear and two chloroplast marker regions were  
386 manually checked, edited where necessary, and assembled in one sequence for each locus  
387 and individual. In cases where cloning revealed the presence of different alleles, cloned  
388 sequences were assigned to different haplotypes or consensus sequences were generated  
389 for cloned sequences differing by only one substitution.

390 Phylogenetic analysis using maximum parsimony (MP) was performed in PAUP\* 4a161  
391 (Swofford, 2002) using either the branch-and-bound algorithm (in cases when fewer than 15  
392 sequences of the single-copy loci occurred in a dataset) or the heuristic search algorithm  
393 with TBR branch swapping for the concatenated GBS-derived sequences and single-copy  
394 loci with 15 and more sequences. Gaps were treated as missing data and we used 1000  
395 random-addition-sequences (RAS) to construct the starting trees in the heuristic search for  
396 the GBS data to avoid suboptimal tree-islands. Bootstrap support values were obtained by  
397 500 bootstrap re-samples using the same settings as before except that we excluded RAS.  
398 Maximum-likelihood analyses were conducted in RAxML v. 8.0.0 (Stamatakis, 2014) using  
399 GTRGAMMA and 100 parsimony starting trees. The number of bootstrap re-samples was set  
400 to 500.

401 Pairwise genetic distances within the GBS dataset were calculated in PAUP\* as uncorrected  
402 ("p") distances for the *C. sativus* individuals and the *C. cartwrightianus* individuals within and  
403 among populations. In both species genetic diversity was rather uniformly distributed among  
404 the individuals.

405 Bayesian assignment analysis for the GBS data was carried out using the LEA package  
406 (François, 2016) in R 3.5.0 in an initial run for  $K = 1$  to  $K = 20$ . The lowest entropy here was  
407 observed for  $K = 9$ . Therefore, for  $K = 2$  to  $K = 14$  Bayesian assignment analysis was run  
408 with 20 repetitions. The run and repetition with lowest cross entropy was identified and  
409 selected. Additionally, the populations of the sampling data were read in using data.table  
410 (Dowle and Srinivasan, 2018). The Q-matrix obtained by LEA, including the ancestral  
411 assignment frequencies, was sorted in R with Tidyverse (Wickham, 2017) according to the  
412 population the samples belong to. Plots were arranged with the gridExtra R package  
413 (Auguie, 2017).

414

#### 415 **Genome size determinations in Attic *C. cartwrightianus***

416 To infer genome sizes and ploidy level of Attic *C. cartwrightianus* individuals we collected a  
417 leaf from each of 100 individuals in the field and dried them in silica gel. Afterwards the  
418 leaves were transported to the lab and genome sizes were measured with a CyFlow Space  
419 (Sysmex Partec) flow cytometer against a *Vicia faba* size standard (26.5 pg 2C) using DAPI  
420 as staining reagent and essentially following the procedure described by Jakob et al. (2004).

421

422

423

## 424 **Acknowledgements**

425 We like to thank the Greek authorities for providing permits for plant collections, I.  
426 Faustmann, C. Koch, B. Kraenzlin and P. Oswald for help with plant cultivation and lab work,  
427 T. Schmidt and T. Heitkam for access to saffron whole-genome shotgun data, A.  
428 Himmelbach and S. König for performing Illumina sequencing, and H. Poskar and J. Brassac  
429 for critical comments on the manuscript. We acknowledge funding by the Deutsche  
430 Forschungsgemeinschaft (grants BL462/15 to F.R.B. and HA7550/2 to D.H.).

431

432

## 433 **Additional information**

### 434 **Competing interests**

435 We declare that no competing interests exist.

436

### 437 **Funding**

438 Deutsche Forschungsgemeinschaft      BL462/15      Frank Blattner

439 Deutsche Forschungsgemeinschaft      HA7550/2      Dörte Harpke

440

### 441 **Author contributions**

442 Designed study: F.R.B., D.H. Coordinated study: Z.N., D.H., F.R.B. Provided data or  
443 materials: H.K. Performed experiments: Z.N. Analyzed data: Z.N., D.H., F.R.B., A.G. The  
444 initial manuscript was written by F.R.B. All authors contributed to and approved the final  
445 version of the manuscript.

446

### 447 **Data Accessibility**

448 All sequence data are available through DDBJ/ENA/GenBank for the nuclear single-copy  
449 genes and the chloroplast locus (LS975036–LS975118), the annotated chloroplast genomes  
450 (MH542231–MH542233), and the GBS data (ERR2740826–ERR2740842, ERR2740845–  
451 ERR2741003).

452

453

## 454 **Additional files**

### 455 **Supplementary files**

456 **Figure supplement 1.** Parsimony consensus tree based on GBS sequence data.

457 **Figure supplement 2.** Maximum-likelihood phylogenetic tree based on GBS sequence  
458 data.

459 **Figure supplement 3.** Panel of Bayesian assignment analyses from  $K = 2$  to  $K = 9$ .

460 **Figure supplement 4.** Chloroplast genome map for *C. cartwrightianus*.

461 **Figure supplement 5.** Panel of five single-copy gene trees calculated with the maximum-  
462 likelihood algorithm to infer the influence of allele diversity in *C. cartwrightianus* on the  
463 phylogenetic position of *C. sativus* and other included *Crocus* species.

464 **Figure supplement 6.** Photographs of *C. sativus* and three individuals of Attic *C.*  
465 *cartwrightianus*.

466 **Table supplement 1.** Studied plant materials.

467 **Table supplement 2.** Analyzed nuclear and chloroplast loci.

468

469

## 470 References

471 Adamack AT, Gruber B. 2014. PopGenReport: simplifying basic population genetic analyses in R.  
472 *Methods Ecol Evol* 5:384-387.

473 Abdullaev FI, Frenkel GD. 1999. Saffron in biological and medical research. In: Negbi M, editor.  
474 Saffron: *Crocus sativus* L., Harwood Acad Publ. p. 103-113.

475 Andrew S. 2010. FastQC: a quality control tool for high throughput sequence data.  
476 <http://www.bioinformatics.babraham.ac.uk/projects/fastqc>.

477 Augue B. 2017. gridExtra: miscellaneous functions for "Grid" graphics. R package version 2.3.  
478 <https://CRAN.R-project.org/package=gridExtra>.

479 Boetzer M, Henkel CV, Jansen HJ, Butler D, Pirovano W. 2011. Scaffolding pre-assembled contigs  
480 using SSPACE. *Bioinformatics* 27:578-579.

481 Boetzer M, Pirovano W. 2012. Toward almost closed genomes with GapFiller. *Genome Biol* 13:R56.

482 Brassac J, Blattner FR. 2015. Species-level phylogeny and polyploid relationships in *Hordeum*  
483 (Poaceae) inferred by next-generation sequencing and *in silico* cloning of multiple nuclear loci.  
484 *Syst Biol* 64:792-808.

485 Brighton CA. 1977. Cytology of *Crocus sativus* and its allies (Iridaceae). *Plant Syst Evol* 128:137-157.

486 Busconi M, Colli L, Sánchez RA, Santaella M, De-Los-Mozos Pascual M, Santana O, Roldán M,  
487 Fernández JA. 2015. AFLP and MS-AFLP analysis of the variation within saffron crocus (*Crocus*  
488 *sativus* L.) germplasm. *PLoS One* 10:e0123434.

489 Danecek P, Auton A, Abecasis G, Albers CA, Banks E, DePristo MA, Handsaker RE, Lunter G, Marth  
490 GT, Sherry ST et al. 2011. The variant call format and VCFtools. *Bioinformatics* 27:2156-2158.

491 Dowle M, Srinivasan A. 2018. Data.table: extension of 'data.frame'. R package version 1.11.2.  
492 <https://CRAN.R-project.org/package=data.table>.

493 Eaton DAE. 2014. Pyrad: assembly of de novo RADseq loci for phylogenetic analyses. *Bioinformatics*  
494 30:1844-1849.

495 Elshire RJ, Glaubitz JC, Sun Q, Poland JA, Kawamoto K, Buckler ES, Mitchell SE. 2011. A robust,  
496 simple genotyping-by-sequencing (GBS) approach for high diversity species. *PLoS One*  
497 6:e19379.

498 François O. 2016. Running Structure-like population genetic analysis with R. PDF R tutorials in  
499 population genetics. Grenoble: University Grenoble-Alpes. p. 1-8.

500 Ghaffari SM. 1986. Cytogenetic studies of cultivated *Crocus sativus* (Iridaceae). *Plant Syst Evol*  
501 153:199-204.

502 Harpke D, Meng S, Kerndorff H, Rutten T, Blattner FR. 2013. Phylogeny of *Crocus* (Iridaceae) based  
503 on one chloroplast and two nuclear loci: ancient hybridization and chromosome number  
504 evolution. *Mol Phylogenet Evol* 66:617-627.

505 Jakob SS, Blattner FR. 2006. A chloroplast genealogy of *Hordeum* (Poaceae): long-term persisting  
506 haplotypes, incomplete lineage sorting, regional extinction, and the consequences for  
507 phylogenetic inference. *Mol Biol Evol* 23:1602-1612.

508 Jakob SS, Meister A, Blattner FR. 2004. The considerable genome size variation of *Hordeum* species  
509 (Poaceae) is linked to phylogeny, life form, ecology, and speciation rates. *Mol Biol Evol* 21:860-  
510 869.

511 Lambeck K. 1996. Sea-level change and shore-line evolution in Aegean Greece since Upper  
512 Palaeolithic time. *Antiquity* 70:588-611.

513 Larsen B, Orabi J, Pedersen C, Ørgaard M. 2015. Large intraspecific genetic variation within the  
514 Saffron–Crocus group (*Crocus* L., Series *Crocus*; Iridaceae). *Plant Syst Evol* 301:425-437.

515 Maddison WP. 1997. Gene trees in species trees. *Syst Biol* 46:523-536.

- 516 Martin M. 2011. Cutadapt removes adapter sequences from high-throughput sequencing reads.  
517 *EMBnet.journal* 17:10-12.
- 518 Mathew B. 1999. Botany, taxonomy and cytology of *C. sativus* L. and its allies. In: Negbi M, editor.  
519 Saffron: *Crocus sativus* L. Amsterdam: Harwood Acad Publ. p. 19-30.
- 520 Meyer M, Kircher M. 2010. Illumina sequencing library preparation for highly multiplexed target  
521 capture and sequencing. *Cold Spring Harbor Protocols*: pdb.prot5448.
- 522 Negbi M. 1999. Saffron cultivation: past, present and future prospects. In: Negbi M, editor. Saffron:  
523 *Crocus sativus* L., Harwood Acad Publ. p. 1-17.
- 524 Negbi M, Negbi O. 2002. The painted plaster floor of the Tell Kabri palace: reflections on saffron  
525 domestication in the Aegean Bronze Age. In: Oren ED, Ahituv S, editors. Aharon Kempinski  
526 Memorial Volume. Beer-Sheva: Ben-Gurion Univ Press. p. 325-340.
- 527 Nemati Z, Blattner FR, Kerndorff H, Erol O, Harpke D. 2018. Phylogeny of the saffron-crocus species  
528 group, *Crocus* series *Crocus* (Iridaceae). *Mol Phylogenet Evol* 127:891-897.
- 529 Nemati Z, Mardi M, Majidian P, Zeinalabedini M, Pirseyedi SM, Bahadori M. 2014. Saffron (*Crocus*  
530 *sativus* L.), a monomorphic or polymorphic species? *Spanish J Agric Res* 12:753-762.
- 531 Pearse D, Crandall KA. 2004. Beyond  $F_{ST}$ : analysis of population genetic data for conservation.  
532 *Conservation Genet* 5:585-602.
- 533 Schmidt T, Heitkam T, Lietke S, Schubert V, Menzel G. 2019. Adding color to a century-old enigma:  
534 multi-color chromosome identification unravels the autotriploid nature of saffron (*Crocus sativus*)  
535 as a hybrid of wild *Crocus cartwrightianus* cytotypes. *New Phytol*: In press.
- 536 Stamatakis A. 2014. RAxML version 8: a tool for phylogenetic analysis and post-analysis of large  
537 phylogenies. *Bioinformatics* 30:1312-1313.
- 538 Straub SCK, Parks M, Weitemier K, Fishbein M, Cronn RC, Liston A. 2012. Navigating the tip of the  
539 genomic iceberg: next-generation sequencing for plant systematics. *Am J Bot* 99:349-364.
- 540 Swofford DL. 2002. *PAUP\**. Phylogenetic Analysis Using Parsimony (\*and Other Methods). Version 4.  
541 Sunderland: Sinauer Associates.
- 542 Tsaftaris A, Pasentsis K, Makris A, Darzentas N, Polidoros A, Kalivas A, Argiriou A. 2011. The study  
543 of the E-class SEPALLATA3-like MADS-box genes in wild-type and mutant flowers of cultivated  
544 saffron crocus (*Crocus sativus* L.) and its putative progenitors. *Plant Phys* 168:1675-1684.
- 545 Van Bel M, Proost S, Wischnitzki E, Movahedi S, Scheerlinck C, Van de Peer Y, Vandepoele K. 2012.  
546 Dissecting plant genomes with the PLAZA comparative genomics platform. *Plant Phys* 158:590-  
547 600.
- 548 Vandepoele K. 2017. A guide to the PLAZA 3.0 plant comparative genomic database. *Methods Mol*  
549 *Biol* 1533:183-200.
- 550 Wendler N, Mascher M, Nöh C, Himmelbach A, Scholz U, Ruge-Wehling B, Stein N. 2014. Unlocking  
551 the secondary gene-pool of barley with next-generation sequencing. *Plant Biotech J* 12:1122-  
552 1131.
- 553 Wickham H. 2017. Tidyverse: easily install and load the 'Tidyverse'. R package version 1.2.1.  
554 <https://CRAN.R-project.org/package=tidyverse>.
- 555



556

557 **Table**

558

559 **Table 1.** Proportion of *C. sativus* GBS alleles occurring within *C. cartwrightianus* and *C.*  
560 *oreocreticus*.

| Population/Species            | N               | Proportion <sup>a</sup> | Normalized proportion <sup>b</sup> |
|-------------------------------|-----------------|-------------------------|------------------------------------|
| Attica                        | 10              | 90.47%                  | 87.99% ( $\pm 0.31$ )              |
| Kea                           | 14 <sup>c</sup> | 90.46%                  | 85.44% ( $\pm 0.98$ )              |
| Tinos                         | 10              | 88.34%                  | 85.23% ( $\pm 0.35$ )              |
| Mykonos                       | 10              | 87.96%                  | 84.88% ( $\pm 0.33$ )              |
| Evia                          | 10              | 86.06%                  | 83.33% ( $\pm 1.10$ )              |
| Anafi                         | 8               | 85.96%                  | 84.70% ( $\pm 0.18$ )              |
| Crete                         | 10              | 85.67%                  | 82.14% ( $\pm 1.65$ )              |
| Syros                         | 9               | 84.25%                  | 82.29% ( $\pm 0.99$ )              |
| Astypalaia                    | 7               | 82.13%                  | 82.13%                             |
| Paros                         | 8               | 75.46%                  | 74.77% ( $\pm 1.39$ )              |
| Individuals above             |                 | 98.54%                  | 98.14% ( $\pm 0.07$ )              |
| Attica extended               | 71              | 97.90%                  |                                    |
| All <i>C. cartwrightianus</i> | 167             | 99.31%                  |                                    |
| <i>C. oreocreticus</i>        | 8               | 76.83%                  | 75.81% ( $\pm 0.09$ )              |

561 <sup>a</sup>Including all individuals per location. <sup>b</sup>To correct for different N, proportions were calculated based on  
562 seven individuals per location. In brackets standard deviations are provided for 10 runs of randomly  
563 sampled individuals. <sup>c</sup>In Kea two populations occur possessing different chloroplast types, which were  
564 each included with seven individuals.

565

566

567  
568  
569

**Figures**

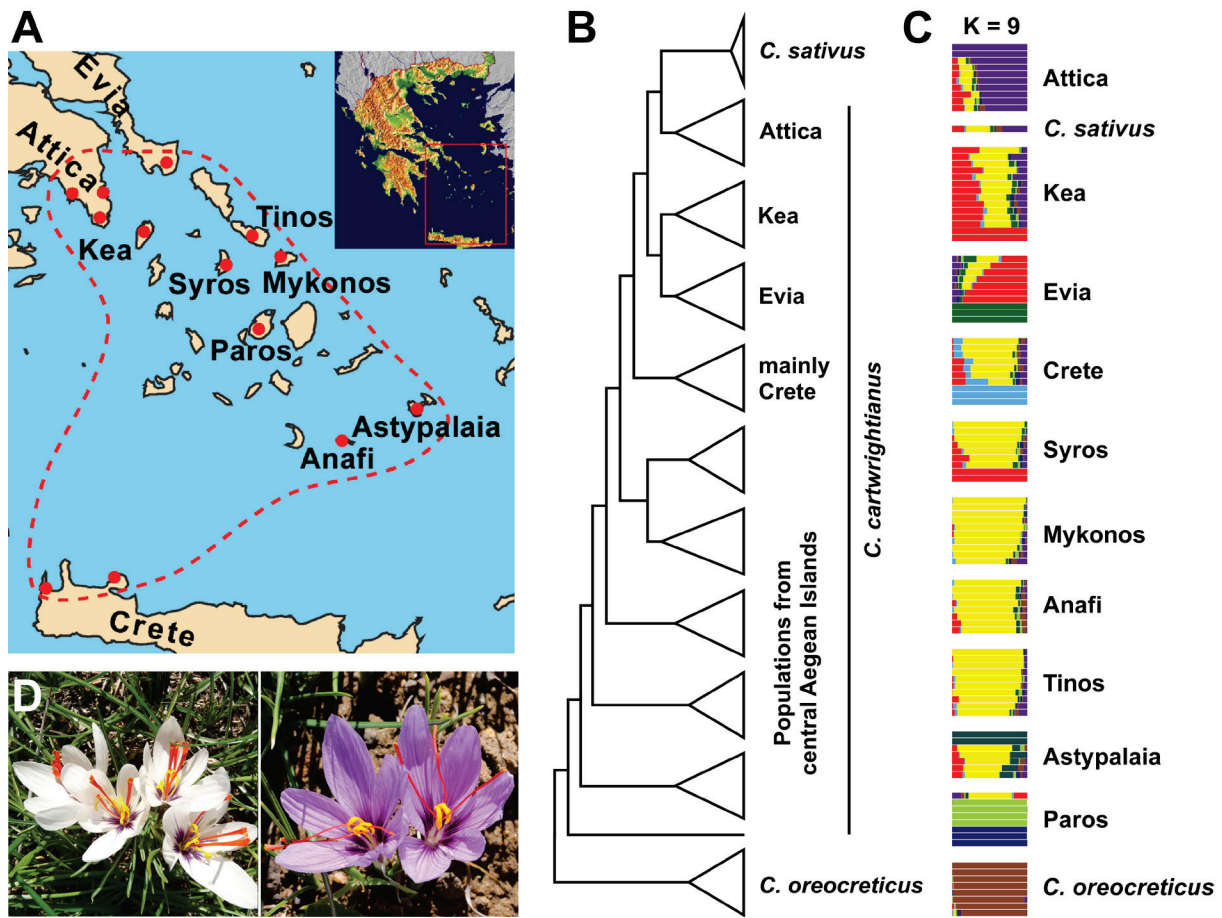

570  
571

**Figure 1.** Distribution and phylogenetic relationships of *C. cartwrightianus* with regard to *C. sativus*. (A) Map providing the distribution area of *C. cartwrightianus* (dashed line). Red dots indicate the collection sites of populations included in the study. (B) Scheme summarizing the topology of two most parsimonious trees based on genome-wide DNA data of a genotyping-by-sequencing analysis of 114 individuals. *Crocus oreocreticus* was defined as outgroup. For clades within *C. cartwrightianus* the geographical origins of the samples are given. (C) Result of a Bayesian population assignment analysis for K = 9. (D) Individuals of *C. cartwrightianus* (left) and *C. sativus* (right).

The following figure supplements are available for figure 1:

581 **Figure supplement 1 – 3**

582 **Figure supplement 6**

583

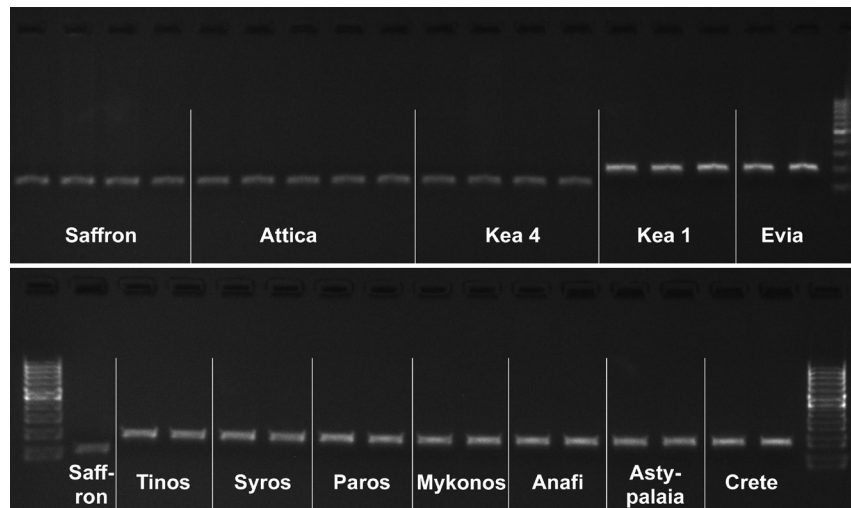

584  
585  
586  
587  
588  
589  
590  
591  
592  
593

**Figure 2.** Gel photos of exemplary samples of PCR amplicons for the distribution of an 84-bp deletion in the chloroplast *trnS-trnG* intergenic spacer of *C. cartwrightianus* and *C. sativus*. The shorter allele (119 bp) occurs only in Attica, one population from Kea and in *C. sativus*, while all other populations of *C. cartwrightianus* possess the longer allele (203 bp).

The following figure supplement is available for figure 2:

**Figure supplement 4**

594 **Supplementary files**

595

596

597 **Saffron (*Crocus sativus*) is an autotriploid that evolved in Attica**

598 **(Greece) from wild *Crocus cartwrightianus***

599

600 **Zahra Nemati,<sup>1,a</sup> Dörte Harpke,<sup>1,a</sup> Almila Gemicioglu,<sup>1,2</sup> Helmut Kerndorff,<sup>1</sup> and Frank R.**  
601 **Blattner<sup>1,\*</sup>**

602

603

604 <sup>1</sup>Leibniz Institute of Plant Genetics and Crop Plant Research (IPK), D-06466 Gatersleben,  
605 Germany.

606 <sup>2</sup>Dept. of Biology, University of Istanbul, Istanbul, Turkey.

607

608 <sup>a</sup>These authors contributed equally to the study

609 \***Corresponding author:** E-mail: [blattner@ipk-gatersleben.de](mailto:blattner@ipk-gatersleben.de)

610

611

612

613

614 **Content**

615

616 **Figure supplement 1.** Parsimony consensus tree based on GBS sequence data.

617 **Figure supplement 2.** Maximum-likelihood phylogenetic tree based on GBS sequence  
618 data.

619 **Figure supplement 3.** Panel of Bayesian assignment analyses from K = 2 to K = 9.

620 **Figure supplement 4.** Chloroplast genome map for *C. cartwrightianus*.

621 **Figure supplement 5.** Panel of five single-copy gene trees calculated with the maximum-  
622 likelihood algorithm to infer the influence of allele diversity in *C. cartwrightianus* on the  
623 phylogenetic position of *C. sativus* and other included *Crocus* species.

624 **Figure supplement 6.** Photographs of *C. sativus* and three individuals of Attic *C.*  
625 *cartwrightianus*.

626 **Table supplement 1.** Studied plant materials.

627 **Table supplement 2.** Analyzed nuclear and chloroplast loci.

628

629

630

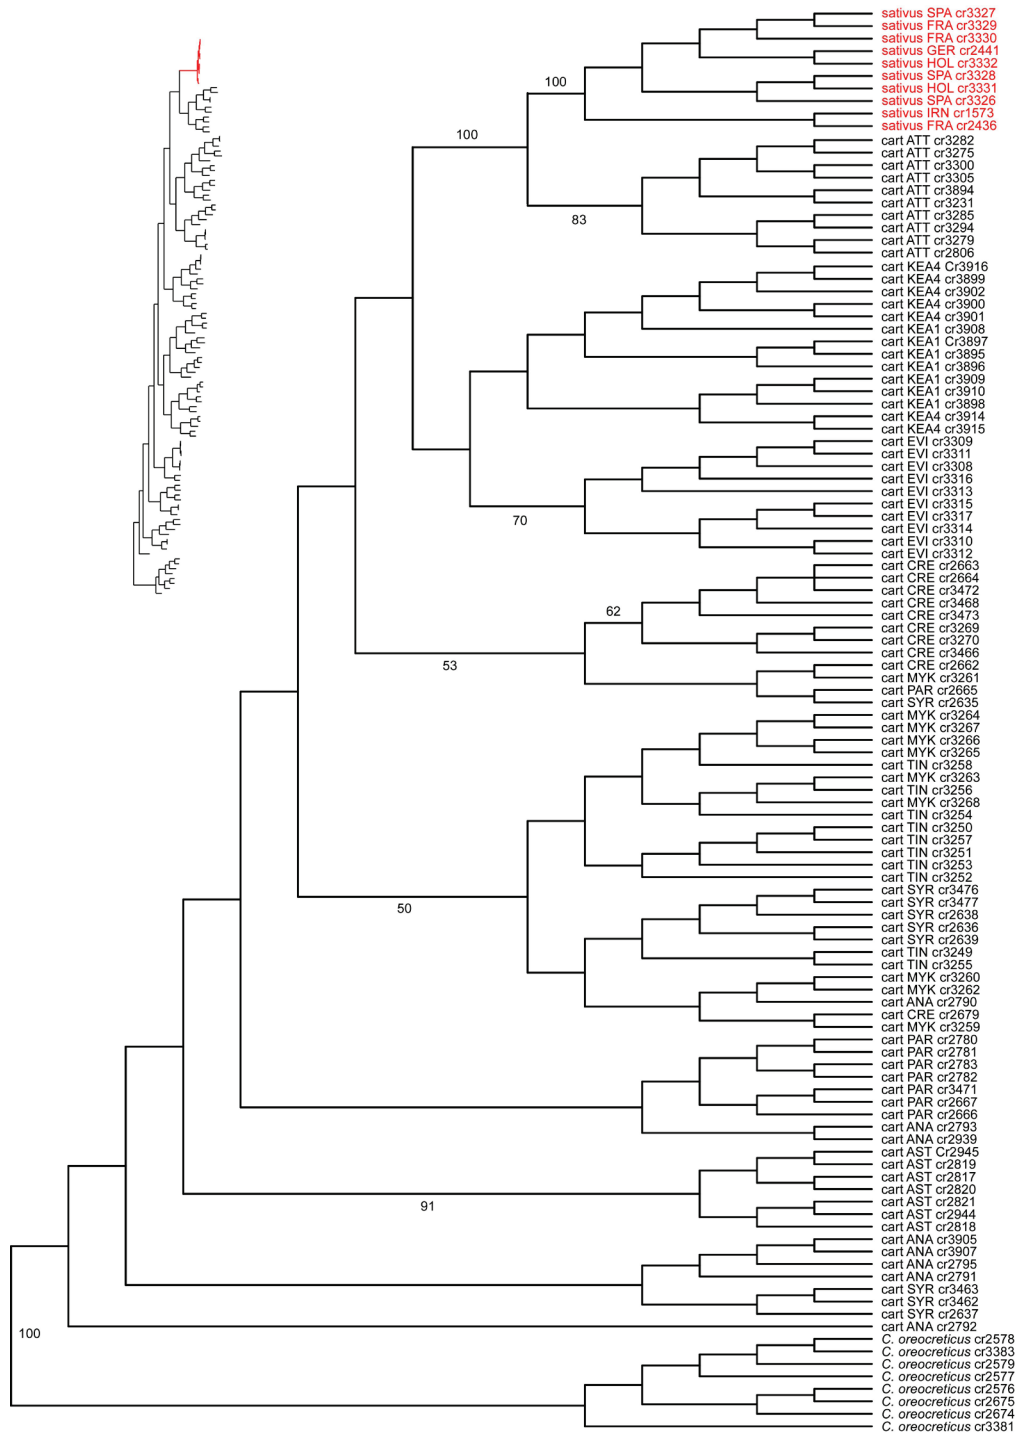





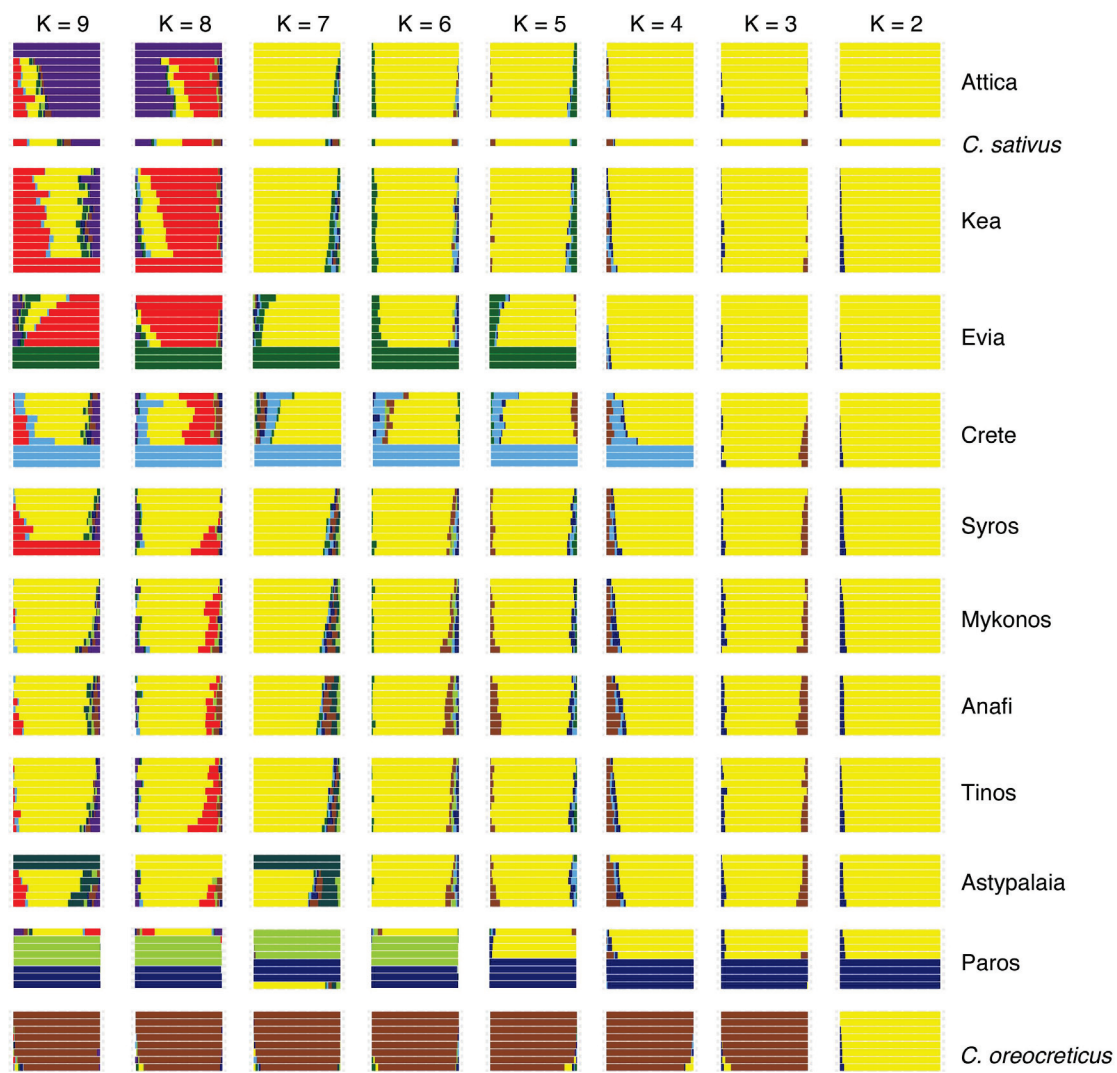

641

642 **Figure S3.** Bayesian assignment analysis plot for the GBS data with K = 2 to K = 9. *Crocus*  
643 *sativus* is assigned to the population from Attica although in some runs it shows also allele  
644 patterns similar to individuals from the island of Kea, however, with different proportions.

645

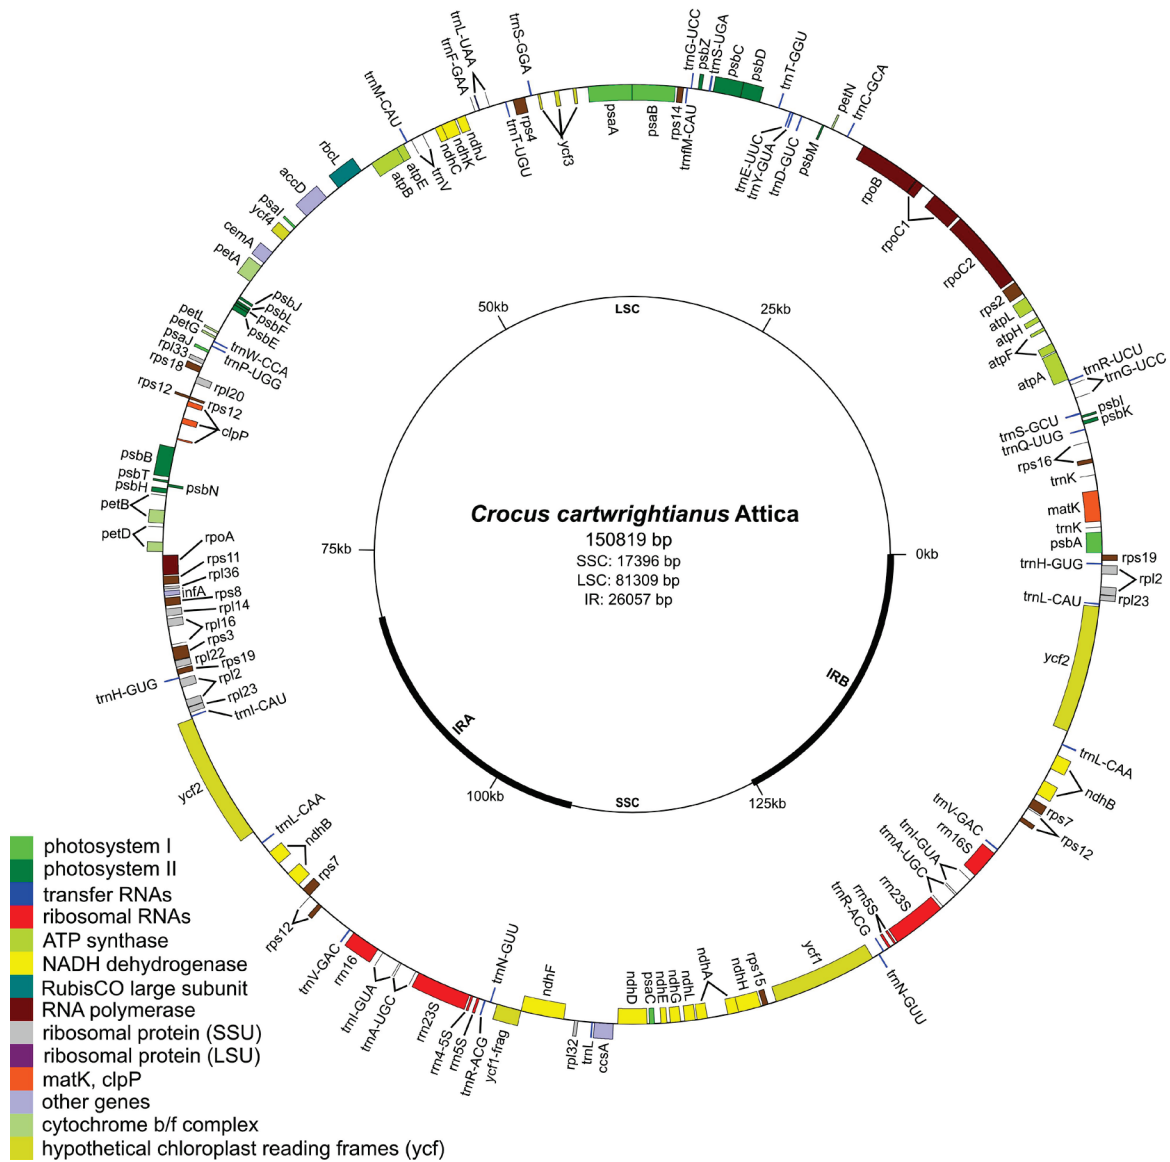

646

647 **Figure S4.** Annotated chloroplast genome of *C. cartwrightianus*. Two other assembled  
 648 chloroplast genomes (*C. cartwrightianus* from Crete and *C. sativus*) are identical regarding  
 649 gene order.

650

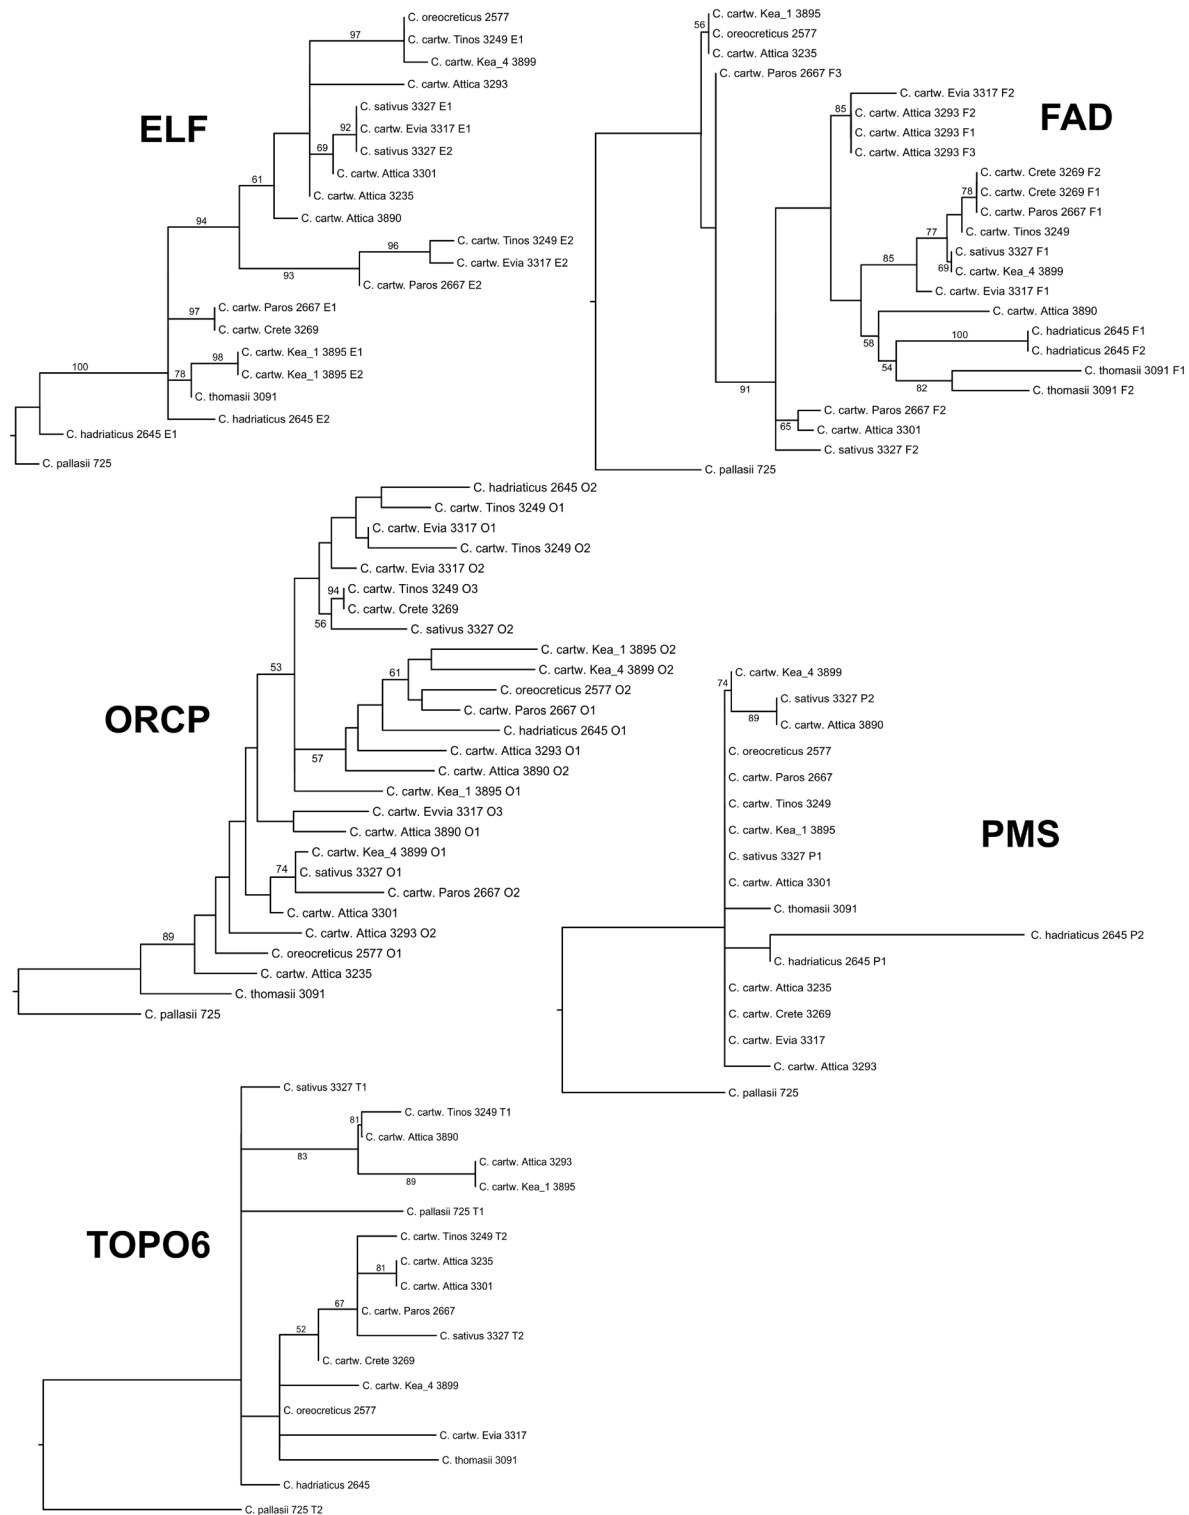

651

652 **Figure S5.** Maximum-likelihood analyses of five single-copy loci in close relatives of *Crocus*  
 653 *sativus*. We analyzed multiple individuals of *C. cartwrightianus* to see how allelic diversity of  
 654 the five genes influences the outcome of phylogenetic analyses regarding the position of *C.*  
 655 *sativus* in relation to *C. cartwrightianus* and other included species. *Crocus pallasii* was  
 656 specified as outgroup in all analyses. The presence of multiple copies of the genes was  
 657 detected via cloning and sequencing of PCR amplicons. Different copies (paralogs or  
 658 homeologs) present in single individuals are indicated by the first letter of the gene name  
 659 followed by numbers 1-3. Numbers along branches depict bootstrap support values derived  
 660 from 500 bootstrap re-samples. For description of the loci see Table S2.

661



662

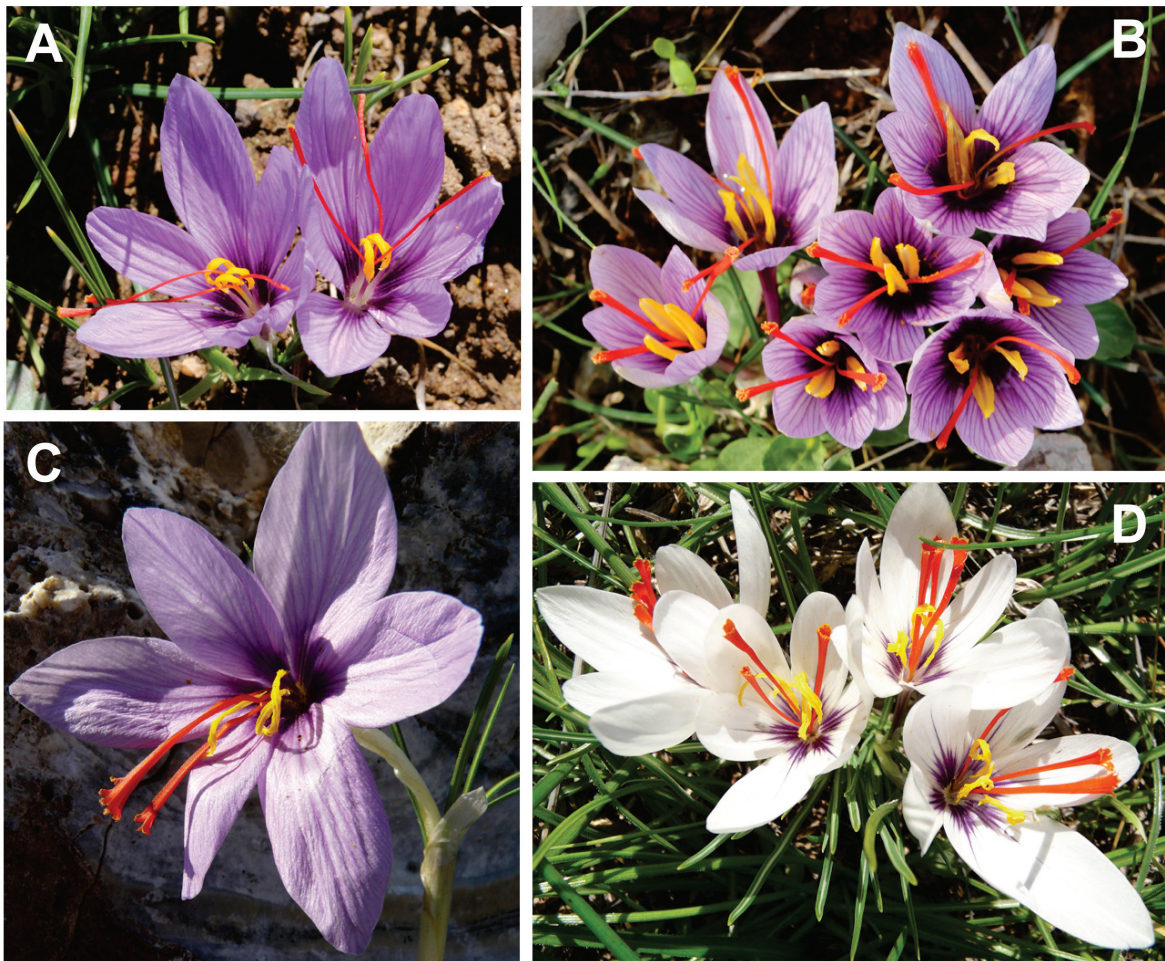

663

664 **Figure S6.** Comparison of *C. sativus* (A) and different individuals of Attic *C. cartwrightianus*  
665 (B-D).

666



667 **Table S1.** Plant materials used in the study.

| Species                                     | Sample origin and ID                                                                                                                                                                                                                                                                                                                                                                                                                                                                                                                                                                                           | Herbarium: ID                                                                |               |
|---------------------------------------------|----------------------------------------------------------------------------------------------------------------------------------------------------------------------------------------------------------------------------------------------------------------------------------------------------------------------------------------------------------------------------------------------------------------------------------------------------------------------------------------------------------------------------------------------------------------------------------------------------------------|------------------------------------------------------------------------------|---------------|
| <i>C. cartwrightianus</i> Herb.             | Anafi: cr2791, cr2792, cr2793, cr2795, cr3905, cr3907, cr2790, cr2939                                                                                                                                                                                                                                                                                                                                                                                                                                                                                                                                          | GAT: HKEP1601, HKEP1603                                                      |               |
|                                             | Astypalaia: cr2817, cr2818, cr2819, cr2820, cr2821, cr2944, cr2945                                                                                                                                                                                                                                                                                                                                                                                                                                                                                                                                             | GAT: HKEP1609                                                                |               |
|                                             | Attica: cr2653, cr2654, cr2655, cr3280, cr3281, cr3282, cr3283, cr3284, cr3285, cr3286, cr3300, cr3301, cr3302, cr3303, cr3304, cr3305, cr3306, cr3307, cr2804, cr2806, cr3226, cr3227, cr3228, cr3229, cr3230, cr3231, cr3232, cr3233, cr2798, cr2799, cr2800, cr3235, cr3236, cr3237, cr3238, cr3240, cr3241, cr2679, cr2811, cr2812, cr2814, cr2815, cr2816, cr3244, cr3245, cr3246, cr3247, cr3248, cr3271, cr3272, cr3273, cr3274, cr3275, cr3276, cr3277, cr3278, cr3279, cr3290, cr3291, cr3292, cr3293, cr3294, cr3295, cr3296, cr3297, cr3298, cr3299, cr2679, cr3890, cr3891, cr3892, cr3893, cr3894 | GAT: HKEP1592, HKEP1592b, HKEP1605, HKEP1606, HKEP1607, NB_2017-002A, DH1802 |               |
|                                             | Crete: cr267, cr306, cr2662, cr2663, cr2664, cr3468, cr3472, cr3473, cr3269, cr3270, cr3466                                                                                                                                                                                                                                                                                                                                                                                                                                                                                                                    | GAT: HKEP1517, HKEP1525, P9430                                               |               |
|                                             | Evia: cr3309, cr3310, cr3311, cr3312, cr3313, cr3314, cr3315, cr3316, cr3317                                                                                                                                                                                                                                                                                                                                                                                                                                                                                                                                   | GAT: HKEP1664                                                                |               |
|                                             | Kea1: cr3895, cr3896, cr3897, cr3898, cr3908, cr3909, cr3910                                                                                                                                                                                                                                                                                                                                                                                                                                                                                                                                                   | GAT: KEA1, KEA4                                                              |               |
|                                             | Kea4: cr3899, cr3900, cr3901, cr3902, cr3914, cr3915, cr3916                                                                                                                                                                                                                                                                                                                                                                                                                                                                                                                                                   |                                                                              |               |
|                                             | Mykonos: cr3259, cr3260, cr3261, cr3262, cr3263, cr3264, cr3265, cr3266, cr3267, cr3268                                                                                                                                                                                                                                                                                                                                                                                                                                                                                                                        | GAT: ZNMYK                                                                   |               |
|                                             | Paros: cr2665, cr2666, cr2667, cr2780, cr2781, cr2782, cr2783, cr3471                                                                                                                                                                                                                                                                                                                                                                                                                                                                                                                                          | GAT: HKEP1445                                                                |               |
|                                             | Syros: cr2635, cr2636, cr2637, cr2638, cr2639, cr3462, cr3463, cr3476, cr3477                                                                                                                                                                                                                                                                                                                                                                                                                                                                                                                                  | GAT: HKEP1443                                                                |               |
|                                             | Tinos: cr3249, cr3250, cr3251, cr3252, cr3253, cr3254, cr3255, cr3256, cr3257, cr3258                                                                                                                                                                                                                                                                                                                                                                                                                                                                                                                          | GAT: ZNTIN                                                                   |               |
|                                             | <i>C. sativus</i> L.                                                                                                                                                                                                                                                                                                                                                                                                                                                                                                                                                                                           | Spain: cr3326, cr3327, cr3328, cr3776, cr3778, cr3781, cr3783, cr3784        | GAT: 163      |
|                                             |                                                                                                                                                                                                                                                                                                                                                                                                                                                                                                                                                                                                                | France: cr2436, cr3329, cr3330, cr3777, cr3780, cr3782, cr3785               | GAT: 160, 164 |
|                                             |                                                                                                                                                                                                                                                                                                                                                                                                                                                                                                                                                                                                                | Iran: cr1573                                                                 | GAT: CsS      |
| Germany: cr2441, cr3779                     |                                                                                                                                                                                                                                                                                                                                                                                                                                                                                                                                                                                                                | GAT: CsG                                                                     |               |
| Netherlands: cr3331, cr3332, cr3333, cr3334 |                                                                                                                                                                                                                                                                                                                                                                                                                                                                                                                                                                                                                | s.n.                                                                         |               |
| <i>C. hadriaticus</i> Herb.                 | Greece, Pindus Mts.: cr2645                                                                                                                                                                                                                                                                                                                                                                                                                                                                                                                                                                                    | GAT: HKEP1580                                                                |               |
| <i>C. oreocreticus</i> B.L.Burtt            | Greece, Crete: cr2576, cr2577, cr2578, cr2579, cr2674, cr2675, cr3381, cr3383                                                                                                                                                                                                                                                                                                                                                                                                                                                                                                                                  | GAT: HKEP1585                                                                |               |
| <i>C. pallasii</i> Goldb.                   | Rep. Northern Macedonia, Kumanovo: cr725                                                                                                                                                                                                                                                                                                                                                                                                                                                                                                                                                                       | Niš, s.n.                                                                    |               |
| <i>C. thomasii</i> Ten.                     | Italy, Apulia: cr3091                                                                                                                                                                                                                                                                                                                                                                                                                                                                                                                                                                                          | GAT: HKEP1614                                                                |               |

668

669

670  
671  
672

**Table S2.** Analyzed genome regions.

| Locus                                                                             | Primer name                                              | Primer sequence (5'–3')                                                        | Ampli-con size (bp) | Annealing temperature/elongation time |
|-----------------------------------------------------------------------------------|----------------------------------------------------------|--------------------------------------------------------------------------------|---------------------|---------------------------------------|
| <b>Nuclear loci</b>                                                               |                                                          |                                                                                |                     |                                       |
| ORTHO005659,<br>FAD dependent<br>oxidoreductase;<br>intron 5, exon 6,<br>intron 6 | FAD_ex5fwd<br>FAD_ex7rwd                                 | ACGTTTGCTCTCATCATCTGGC<br>CCTAGAGCAATCTCAACACCTGC                              | ~700                | 68 °C/25 sec                          |
| ORTHO008517,<br>FAD/NAD(P)-<br>binding<br>oxidoreductase                          | orcp_f<br>orcp_r                                         | GGCTTCCAAATCTTCCTCACCGC<br>AAAGCCTCTGCAGCTCTTCTCCC                             | ~1100               | 68 °C/60 sec                          |
| ORTHO006661,<br>mismatch repair<br>endonuclease<br>PMS; intron 3                  | pms_ex3f<br>pms_ex4r                                     | GAAACCAGAACAAAAGATGAGCC<br>TGGGCATATCAACAGGTCTACC                              | ~750                | 62 °C/30 sec                          |
| ORTHO006442,<br>Topoisomerase 6<br>subunit B; intron<br>11                        | croc_Top6_11f <sup>a</sup><br>croc_Top6_12r <sup>a</sup> | CAGTTTCTTCAACACGAATTT<br>ATGGATTCTAACTATTTGTTGGG                               | ~750                | 59 °C/25 sec                          |
| ORTHO004935,<br>Elongation factor<br>2A; intron 2, exon<br>3, intron 3            | eIF2A_Ex1f <sup>b</sup><br>eIF2A_Ex4r <sup>b</sup>       | GATGAATCTATTGCTTGCCGAATG <sup>2</sup><br>GTCATATATTGTAGCCTTCGCAGG <sup>2</sup> | ~750                | 62 °C/30 sec                          |
| <b>Chloroplast loci</b>                                                           |                                                          |                                                                                |                     |                                       |
| <i>trnS</i> (GCU) –<br><i>trnG</i> (UCC) IGS                                      | croc_trnSf<br>croc_trnS-Gr                               | CCTGGTTAAGTAAAGTACTGG<br>TCTCAAGTATTCAAATAAAGC                                 | 119/203             | 54 °C/20 sec                          |
| <i>accD</i> – <i>psaL</i> IGS                                                     | accD_f<br>psaL_IGS_r                                     | TGCTGAACCCAATGCCTACG<br>TTCACGACTTCCTCGAAAGG                                   | ~490                | 57 °C/15 sec                          |

673 <sup>a</sup>Nemati et al. (2018); <sup>b</sup>Erol et al. (2015, *Phytotaxa* 239:223-232)

674  
675
